# Supplementary material for: Beyond the Bowel: Novel Comorbidity Patterns in Inflammatory Bowel Disease from the All of Us Research Program
Source: Research Square preprint supplement (doi:10.21203/rs.3.rs-7392555/v1), 2025-09-23
Supplement: Supplementary file 2 [file 996ea69a9c16ef974a65ca32.docx]

**STROBE Statement—Checklist for Case-Control Studies**

**Manuscript Title:** Beyond the Bowel: Novel Comorbidity Patterns in Inflammatory Bowel Disease from the All of Us Research Program

| Item No | STROBE Recommendation | Location in Manuscript | Description/Comments |
| --- | --- | --- | --- |
| Title and Abstract |  |  |  |
| 1a | Indicate the study's design with a commonly used term in the title or the abstract | Title and Abstract | "Case-control study" clearly stated in abstract. |
| 1b | Provide in the abstract an informative and balanced summary of what was done and what was found | Abstract | Complete structured abstract with background, methods, results, and conclusions. |
| Introduction |  |  |  |
| 2 | Explain the scientific background and rationale for the investigation being reported | Introduction, pages 3-6 | Comprehensive background on IBD comorbidities, demographic limitations, and study rationale |
| 3 | State specific objectives, including any prespecified hypotheses | Introduction, final paragraph (page 4); Methods (page 5) | Study aim clearly stated: "systematically investigate comorbidity associations with IBD" |
| Methods |  |  |  |
| 4 | Present key elements of study design early in the paper | Methods, Study Design section (page 5) | Case-control design with 1:4 matching explicitly described |
| 5 | Describe the setting, locations, and relevant dates | Methods, Data Source section (page 5) | All of Us Research Program, analysis period October 2024-February 2025 |
| 6a | Give the eligibility criteria and sources/methods of case ascertainment and control selection | Methods, Study Population section (page 5) | OMOP concept codes for IBD cases, control selection criteria clearly defined |
| 6b | For matched studies, give matching criteria and number of controls per case | Methods, Control Selection section (page 6) | 1:4 matching by age (±1 year), gender (exact), race (exact) |
| 7 | Clearly define all outcomes, exposures, predictors, potential confounders, and effect modifiers | Methods, Comorbidity Identification section (page 8) | All variables defined using OMOP codes; demographic confounders specified |
| 8 | Give sources of data and details of methods of assessment | Methods, Data Source and Comorbidity sections (pages 5-11) | OMOP Common Data Model v5.2, EHR data, survey responses detailed |
| 9 | Describe any efforts to address potential sources of bias | Methods, Statistical Analysis; Discussion, Limitations | Mantel-Haenszel adjustment, FDR correction, demographic matching described |
| 10 | Explain how the study size was arrived at | Methods, Study Population section | Sample size determined by available IBD cases in All of Us dataset (5,094 cases available) |
| 11 | Explain how quantitative variables were handled | Methods, Statistical Analysis section (page 8) | Age handled as continuous variable; categorical variables described |
| 12a | Describe all statistical methods, including those used to control for confounding | Methods, Statistical Analysis section | Logistic regression, Mantel-Haenszel adjustment, FDR correction detailed |
| 12b | Describe any methods used to examine subgroups and interactions | Methods, Statistical Analysis section (page 11) | Volcano plot analysis, stratified analyses described |
| 12c | Explain how missing data were addressed | Methods, Control Selection section (page 6) | Exclusion criteria for missing demographic data specified |
| 12d | Explain how matching of cases and controls was addressed | Methods, Control Selection section (page 6) | Cohort Matcher tool, 1:4 matching procedure, adjustment for imperfect matching |
| 12e | Describe any sensitivity analyses | Methods, Statistical Analysis; Results, Sensitivity Analysis (page 18) | Sparse data analysis, temporal relationship exploration described |
| Results |  |  |  |
| 13a | Report numbers of individuals at each stage of study | Methods, Study Population section; Results, Demographic section | 413,457 total participants → 5,094 IBD cases → 20,376 matched controls |
| 13b | Give reasons for non-participation at each stage | Methods, exclusion criteria (page 7) | Missing demographic data exclusions specified |
| 13c | Consider use of a flow diagram | Methods, Study Population section (page 5) | Detailed numerical breakdown provided in text |
| 14a | Give characteristics of study participants | Results, Table 1 | Comprehensive demographic and clinical characteristics table |
| 14b | Indicate number of participants with missing data | Results, Table 1 | Missing data percentages reported for each variable |
| 15 | Report numbers in each exposure category | Results, Tables 2A and 2B | Case and control counts with percentages for each comorbidity |
| 16a | Give unadjusted and confounder-adjusted estimates with precision | Results, Tables 2A/2B; Figure 2 | Both unadjusted and adjusted ORs with 95% CIs reported |
| 16b | Report category boundaries when continuous variables were categorized | Methods, demographic variables section (page 8) | Age categories, income brackets clearly defined |
| 16c | Consider translating relative risk into absolute risk | Results, clinical significance discussion (page 19) | Prevalence percentages provided alongside ORs |
| 17 | Report other analyses done | Results, Sensitivity Analysis section | Sparse data analysis, exploratory temporal analyses described |
| Discussion |  |  |  |
| 18 | Summarize key results with reference to study objectives | Discussion, first paragraph (page 21) | Key findings summarized: 22 associations, novel discoveries, demographic diversity |
| 19 | Discuss limitations considering sources of bias/imprecision | Discussion (page 23), Limitations section; Results, Sensitivity Analysis | Cross-sectional design, diagnostic codes, confounding, sparse data limitations |
| 20 | Give cautious interpretation considering objectives, limitations, evidence | Discussion, Novel Associations and Conclusion sections (page 21) | Balanced interpretation with biological plausibility, literature context |
| 21 | Discuss generalizability of study results | Discussion, Demographic Diversity section (page 22) | Enhanced generalizability due to 29.2% non-White participation |
| Other Information |  |  |  |
| 22 | Give source of funding and role of funders | Acknowledgements section | NIH All of Us Research Program funding detailed with grant numbers |

**Additional Notes:**

- All statistical methods follow established epidemiological practices for case-control studies
- Data availability and reproducibility information provided in Methods section
- Conflict of interest statement included
- Supplementary tables provide additional methodological details
